# Supplementary material for: Multifunctional poly(ester urethane) laminates with encoded information
Source: Royal Society of Chemistry journal article supplement (doi:10.1039/c3ra45651j), 2013-11-20
Supplement: c3ra45651j.pdf [file c3ra45651j.pdf]

## Supplementary Information for

# Multifunctional poly(ester urethane) laminates with encoded information

Melanie Ecker<sup>a</sup> and Thorsten Pretsch<sup>a\*</sup>

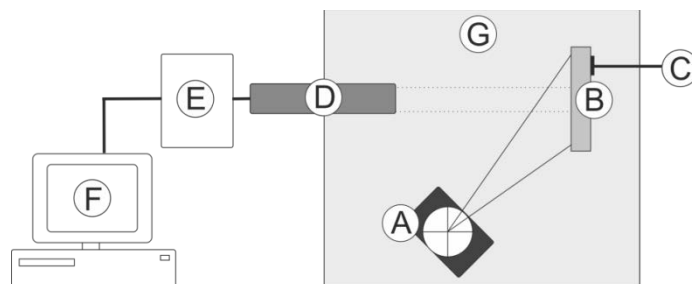

**Fig. S1.** Experimental setup for spectral analysis including light source (A), sample (B), thermo-sensing element (C), collector (D), modular spectrometer system (E), computer (F) and climate chamber (G). The used measuring geometry was  $45^\circ/0^\circ$ . Therefore, the sample (B) was illuminated with a light beam (A) at an angle of  $45^\circ$  and the light-collecting lens system (D) was placed vis-à-vis to the sample. The whole setup was arranged in a climate chamber VCL 4006 from Vötsch Industrietechnik GmbH (G). The sample temperature was measured with a thermo-sensing element (C). The used spectrometer (MultiSpec from tec5; (E)) operated in a wavelength scan range from 730 to 360 nm; the used software was tec5 AdminTool (F).

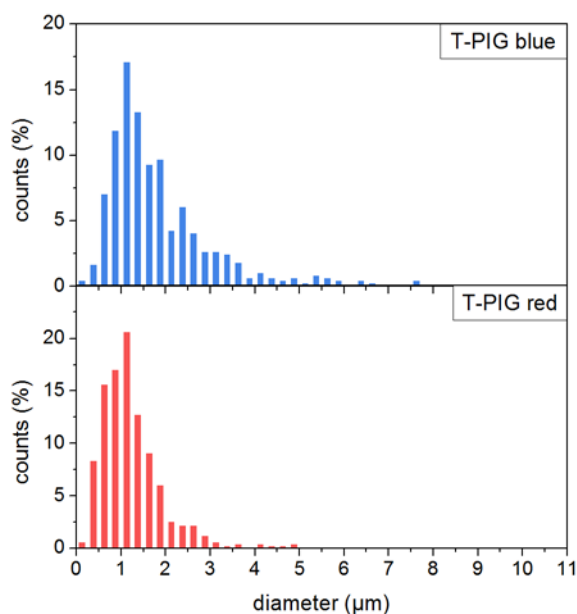

**Fig S2.** Size distribution of as-received powdery T-PIG blue and red as determined from SEM images. The mean particle size was about  $1.8 \mu\text{m}$  for T-PIG blue and  $1.2 \mu\text{m}$  for T-PIG red.

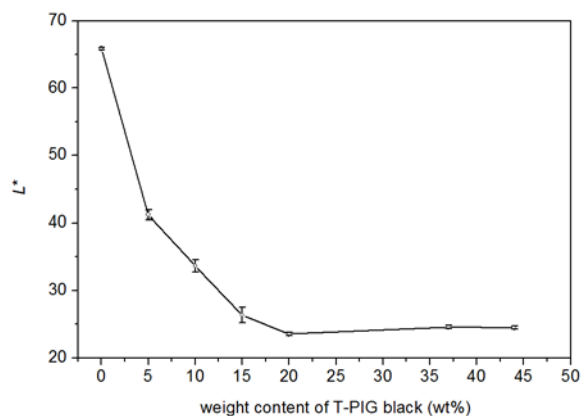

**Fig. S3.** CIELAB lightness  $L^*$  of PEU films loaded with different weight contents of T-PIG black. The films were investigated at 23 °C and characterized by a thickness of  $(95 \pm 10)$   $\mu\text{m}$ .

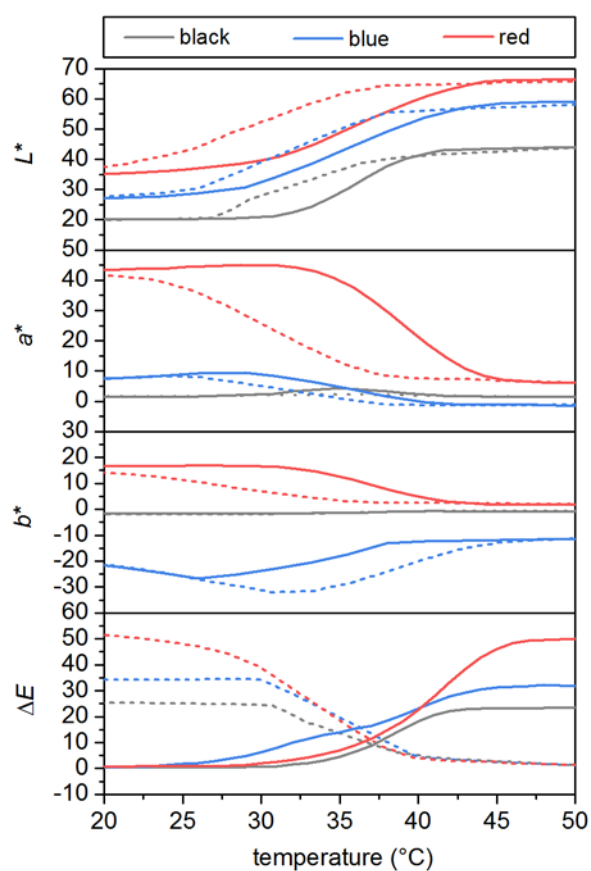

**Fig. S4.** Temperature-dependence of the colorimetric properties of PEU films, containing either 20 wt% of T-PIG black, blue or red. The thickness of the films was  $(95 \pm 10)$   $\mu\text{m}$ . The temperature evolution in lightness  $L^*$ , the opponent color values  $a^*$  and  $b^*$  and the color difference  $\Delta E$  is given during heating (continuous lines) and cooling (dashed lines).

**Table S1.** Calorimetric properties of solvent-cast PEU films with and without fillers during first heating (melting peak temperatures  $T_m$  and enthalpies  $\Delta H_m$ ) and cooling (crystallization peak temperatures  $T_c$ ).

| Sample                                  | $T_m$ (°C) | $\Delta H_m$ (J/g) | $T_m$ (°C)      | $T_c$ (°C)      |
|-----------------------------------------|------------|--------------------|-----------------|-----------------|
|                                         | [PBA]      | [PBA]              | [T-PIG solvent] | [T-PIG solvent] |
| PEU film                                | 54.5       | 38.7               | n/a             | n/a             |
| PEU film loaded with 5 wt% T-PIG black  | 56.0       | 35.7               | 39.6            | 26.2            |
| PEU film loaded with 20 wt% T-PIG black | 55.5       | 34.8               | 41.0            | 27.8            |
| PEU film loaded with 20 wt% T-PIG blue  | 53.5       | n/a                | 43.0            | 28.9            |
| PEU film loaded with 20 wt% T-PIG red   | 53.5       | n/a                | 45.9            | 27.6            |
